# Supplementary material for: Accurate Computation of Survival Statistics in Genome-Wide Studies
Source: PLOS journal article supplement (doi:10.1371/journal.pcbi.1004071), 2015-05-07
Supplement: S13 (10.1371/journal.pcbi.1004071.s013) [file journal.pcbi.1004071.s013]

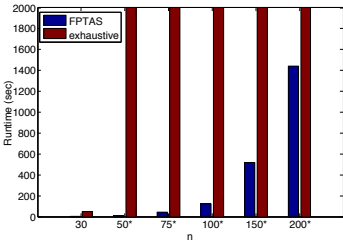

(a)

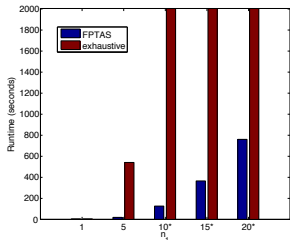

(b)

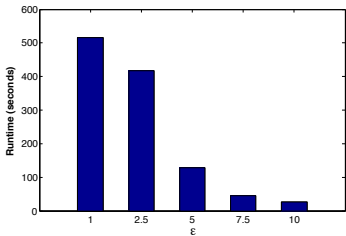

(c)

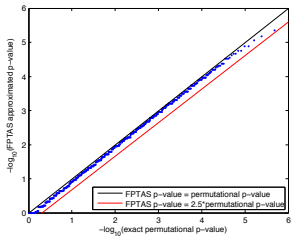

(d)
